# Supplementary material for: Eu3+-doped β-Ga2O3 nanophosphors: annealing effect, electronic structure and optical spectroscopy
Source: Royal Society of Chemistry journal article supplement (doi:10.1039/c0cp02520h), 2011-01-01
Supplement: c0cp02520h.pdf [file c0cp02520h.pdf]

## Supplementary Material

### **Eu<sup>3+</sup> doped $\beta$ -Ga<sub>2</sub>O<sub>3</sub> Nanophosphors: Annealing Effect, Electronic Structure and Optical Spectroscopy**

*Haomiao Zhu, Renfu Li, Wenqin Luo, and Xueyuan Chen\**

Key Laboratory of Optoelectronic Materials Chemistry and Physics, Fujian Institute of Research on the Structure of Matter, Chinese Academy of Sciences, Fuzhou, Fujian 350002, China; State Key Laboratory of Structural Chemistry, Fuzhou, Fujian 350002, China

\* Corresponding author, E-mail: xchen@fjirsm.ac.cn.

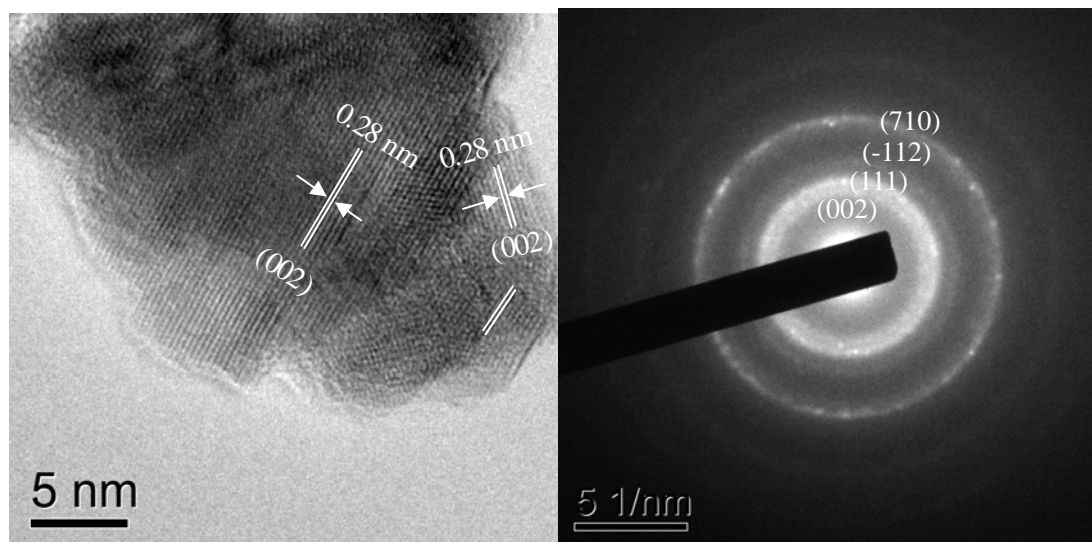

**Figure S1** TEM and SAED images of the sample annealed at 650 °C.

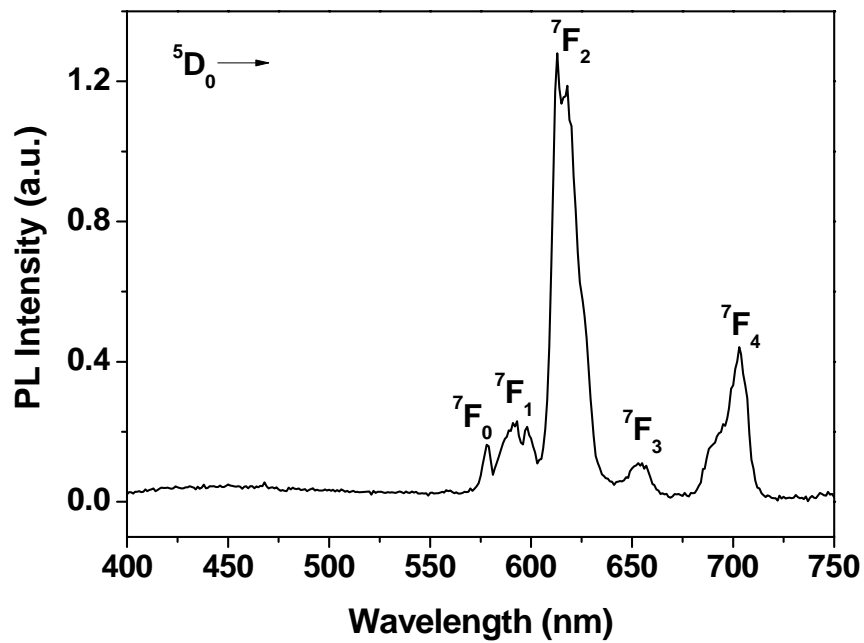

**Figure S2** RT emission spectrum of 0.1 at.% Eu<sup>3+</sup> doped  $\beta$ -Ga<sub>2</sub>O<sub>3</sub> NCs annealed at 650 °C upon excitation at 285 nm.

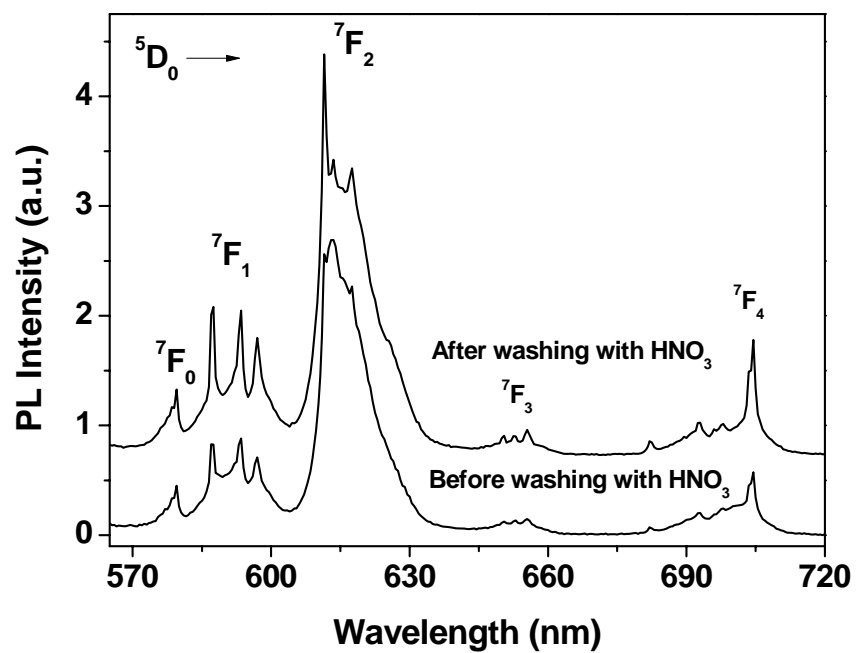

**Figure S3** RT emission spectra of the sample annealed at 1000 °C before and after washing with diluted HNO<sub>3</sub> upon excitation at 285 nm.
